# Supplementary material for: A one-stop microfluidic-based lung cancer organoid culture platform for testing drug sensitivity
Source: Royal Society of Chemistry journal article supplement (doi:10.1039/c9lc00496c), 2019-01-01
Supplement: c9lc00496c1.pdf [file c9lc00496c1.pdf]

1 **Supplementary data**

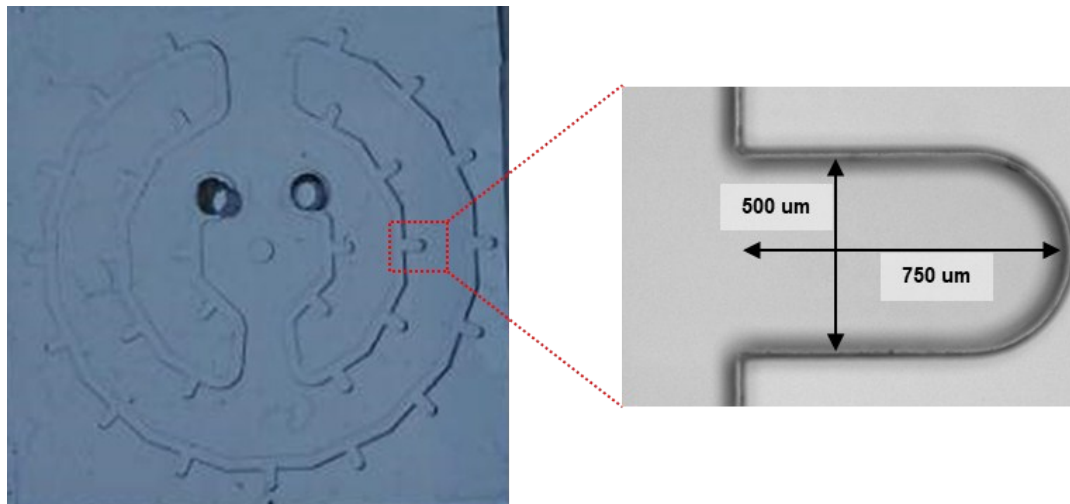

2

3 **Fig. S1. Photograph of the PDMS chip.** PDMS chips 20 mm x 20 mm in area were fabricated  
4 with an integrated well width of 500  $\mu\text{m}$  and a depth of 750  $\mu\text{m}$ .

5

6

7

8

9

10

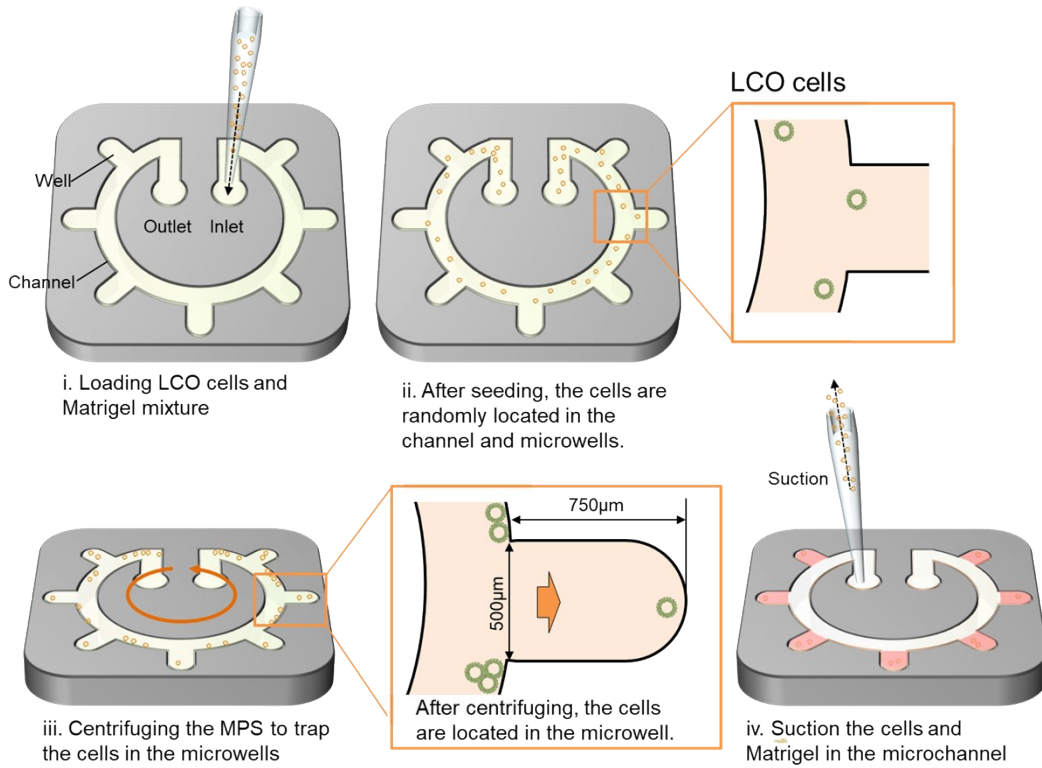

11

12 **Fig. S2. Overview of the seeding and trapping procedure of LCOs on the MPS.** The mixture  
 13 of mechanically dissociated cells is introduced into the microchannel on the device, and cells are  
 14 trapped into the microwells by centrifugal force. After cell trapping, remaining cells in the  
 15 microchannel are removed.

16

17

18

19

20

21

22

23

24

25

26

27

28

29

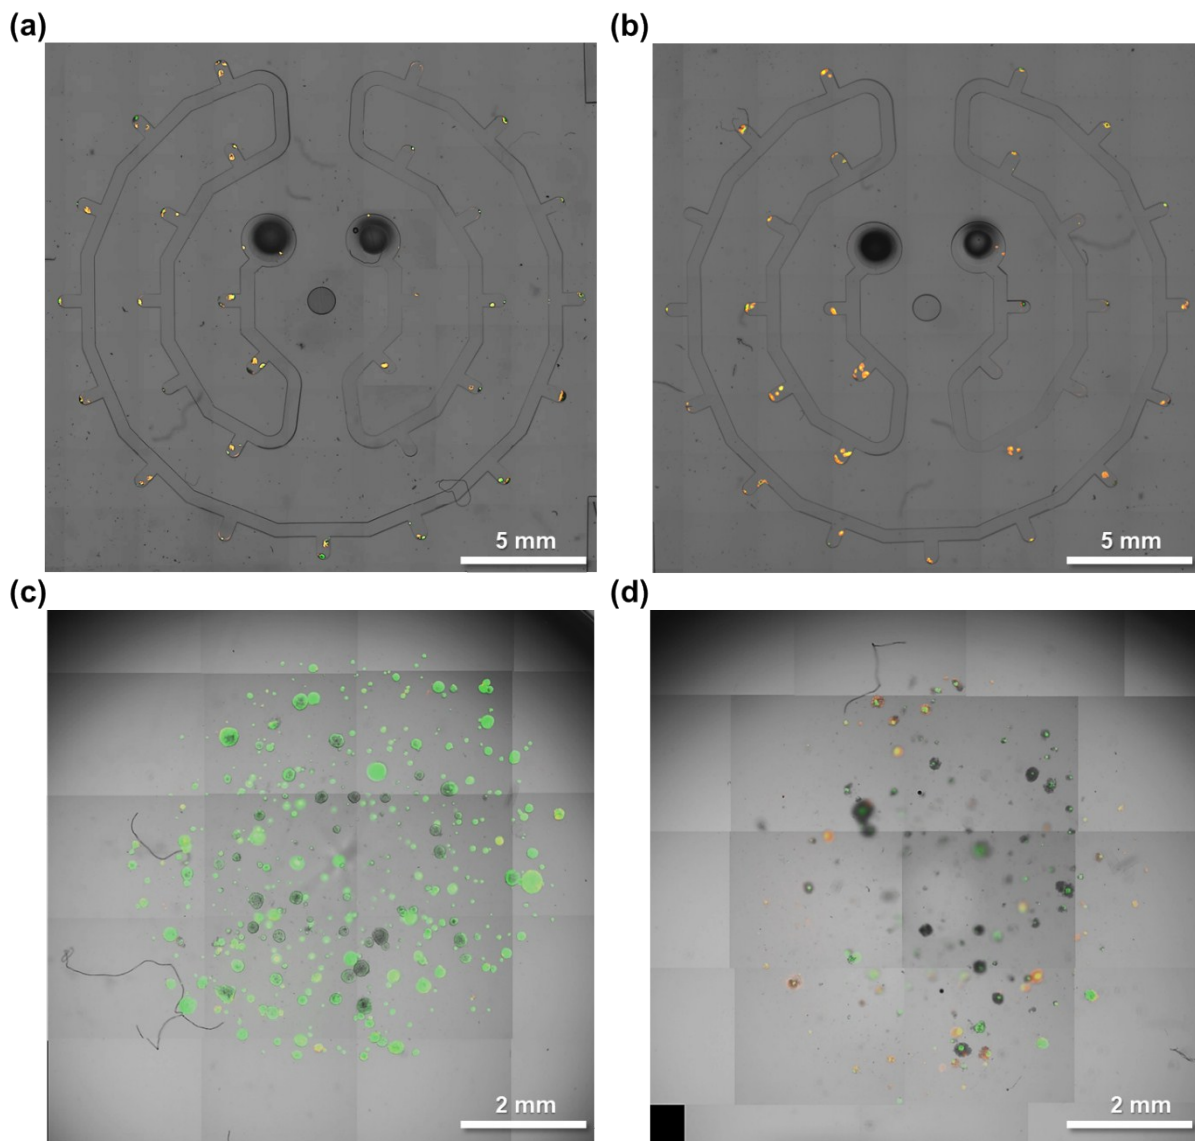

30

31 **Fig. S3. The microfluidic-based PDMS chip for testing drug response.** (a and b) Composite  
32 tile scan image of live/dead staining of LCOs in the microfluidic culture platform treated  
33 for 72 h with (a) 40  $\mu\text{M}$  cisplatin or (b) 20  $\mu\text{M}$  etoposide. (c and d) Composite tile scan  
34 image of live/dead staining of LCOs in adherent Matrigel droplet culture conditions  
35 treated for 72 h with (c) 40  $\mu\text{M}$  cisplatin or (d) 20  $\mu\text{M}$  etoposide. Bar, 5 mm in (a), (b); 2  
36 mm in (c), (d).

37

38

39

40

41

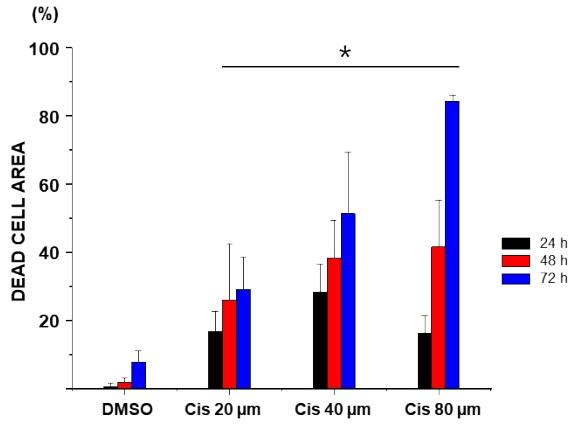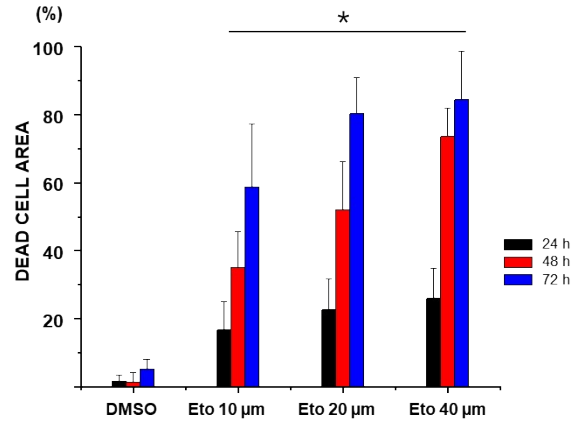

42

43 **Fig. S4. The microfluidic-based PDMS chip for testing drug response.** Cell viability was  
 44 measured by live/dead fluorescence after drug treatment using the microfluidic device  
 45 and quantification of the fluorescence intensity. Data represent the means  $\pm$  S.D. \*p  
 46  $<0.05$ , using two-way ANOVA with Tukey's posttest.

47

48

49

50

51

52

53

54

55

56

57

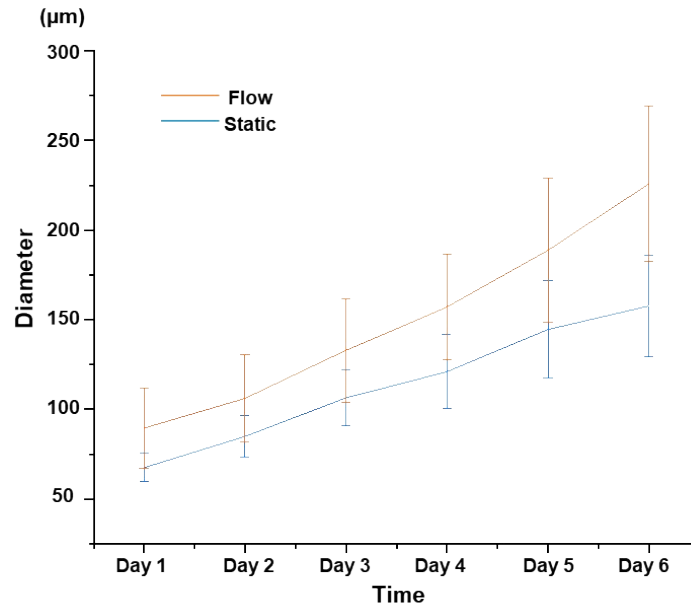

58

59 **Fig. S5. Effect of circulatory flow on growth of LCOs.** Monitored the diameter of the LCOs  
 60 over a time course. LCOs diameter was recorded using ImageJ software. Data represent  
 61 the mean  $\pm$  S.D. from 3 independent measurements (n=18, respectively)

62

63

64 **Table S1. DNA Primers used in this study.**

| Gene                  | Forward primer                     | Reversed primer                     |
|-----------------------|------------------------------------|-------------------------------------|
| <i>GAPDH</i>          | AGG GCT GCT TTT AAC TCT GGT        | CCC CAC TTG ATT TTG GAG GGA         |
| <i>CD133</i>          | AAC AGT TTG CCC CCA GGA AA         | GAA GGA CTC GTT GCT GGT GA          |
| <i>SOX2</i>           | GGA TAA GTA CAC GCT GCC CG         | ATG TGC GCG TAA CTG TCC AT          |
| <i>NANOG</i>          | AGT CCC AAA GGC AAA CAA CCC ACT TC | TGC TGG AGG CTG AGG TAT TTC TGT CTC |
| <i>Chromogranin A</i> | GTC GGG GTA TAT AAG CGG GG         | CGT CTG TCG GTC GAT CCT C           |
| <i>Synaptophysin</i>  | AGT GCG CTA GAG CAT TCT GG         | TCT GCC TCG CTT AAA GCC TC          |
| <i>TTF1</i>           | GCG CTT TCG GAG GGT TAG A          | GTG GCC CTG TCC TTG ATG TT          |

65

66

67

68
